# Supplementary material
Source: PubMed Central journal article supplement (PMC3463965)
Supplement: embor2012119s1.pdf [file embor2012119s1.pdf]

**SUPPLEMENTARY INFORMATION**  
**Supplementary Tables**

**Table S1. *S. cerevisiae* spore viability analysis**

| strains                  |   | WT         | <i>hpr1Δ</i> |
|--------------------------|---|------------|--------------|
| % Spore viability (n)    |   | 97 (90)    | 56.2 (121)   |
| Viable spores per tetrad | 4 | 81         | 20           |
|                          | 3 | 7          | 29           |
|                          | 2 | 2          | 45           |
|                          | 1 | 0          | 14           |
|                          | 0 | 0          | 13           |
| % Sporulation (n)        |   | 98.5 (900) | 74.7 (900)   |

**Table S2. *S. cerevisiae* spore viability analysis with and without RNase H1 overexpression**

| strains                  |   | WT         | WT<br>RNaseH1 | <i>hpr1Δ</i> | <i>hpr1Δ</i><br>RNase H1 | WT<br>(0.5%gal) |
|--------------------------|---|------------|---------------|--------------|--------------------------|-----------------|
| % Spore viability (n)    |   | 98.3 (90)  | 73.6 (90)     | 60 (90)      | 48.1 (90)                | 94.5 (54)       |
| Viable spores per tetrad | 4 | 85         | 22            | 10           | 5                        | 43              |
|                          | 3 | 4          | 41            | 35           | 28                       | 10              |
|                          | 2 | 1          | 25            | 31           | 20                       | 1               |
|                          | 1 | 0          | 2             | 9            | 29                       | 0               |
|                          | 0 | 0          | 0             | 5            | 8                        | 0               |
| % Sporulation (n)        |   | 98.5 (300) | 98.5 (300)    | 74.5 (300)   | 79.7 (300)               | 96.1 (300)      |

**Table S3. *C. elegans thoc-2* is an essential gene.**

| Genotype                                      | n  | Total eggs | Viable progeny | Percent lethality | Brood size <sup>b</sup> |
|-----------------------------------------------|----|------------|----------------|-------------------|-------------------------|
| N2 (wt)                                       | 10 | 2978       | 2932           | 1.6               | 297.8±10.5              |
| <i>thoc-2(ok961)</i> heterozygous             | 20 | 2764       | 1029           | 62.8 <sup>c</sup> | 176.8±25.8              |
| <i>thoc-2(ok961)</i> homozygous <sup>a</sup>  | 6  | 0          | 0              | NA                |                         |
| <i>thoc-2(tm1310)</i> heterozygous            | 20 | 2835       | 896            | 68.4 <sup>c</sup> | 192.05±27.8             |
| <i>thoc-2(tm1310)</i> homozygous <sup>a</sup> | 6  | 0          | 0              | NA                |                         |

Embryonic lethality was scored by comparing the number of eggs that hatch to produce viable progeny versus the total number of eggs laid. <sup>a</sup> Hermaphrodites used were homozygous *thoc-2* mutants derived from *thoc-2* -/+ parents. <sup>b</sup> Average brood size ± SD (p<0.001; Student's t-Test). <sup>c</sup> The expected lethality for carrying the hT2 balancer chromosomes is 68.75%.

**Supplementary Figures**

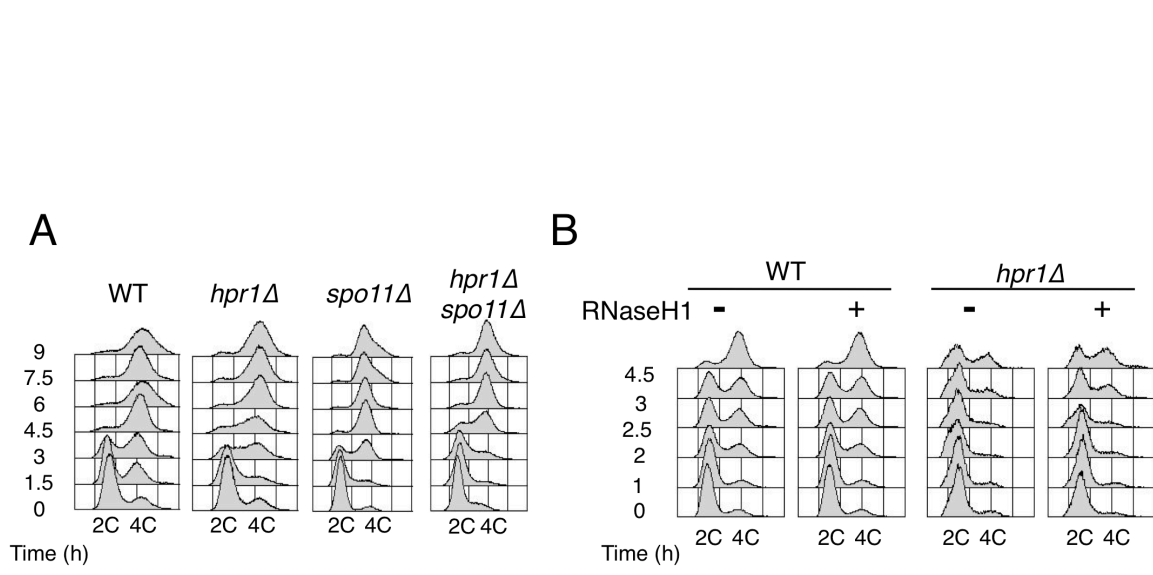

**Fig. S1. *hpr1Δ* cell cycle profile.** (A) FACS analysis of DNA contents after transfer to sporulation media for the indicated strains. (B) FACS analysis of DNA contents after transfer to sporulation media for the indicated strains in the presence of absence of RNase H1 overexpression.

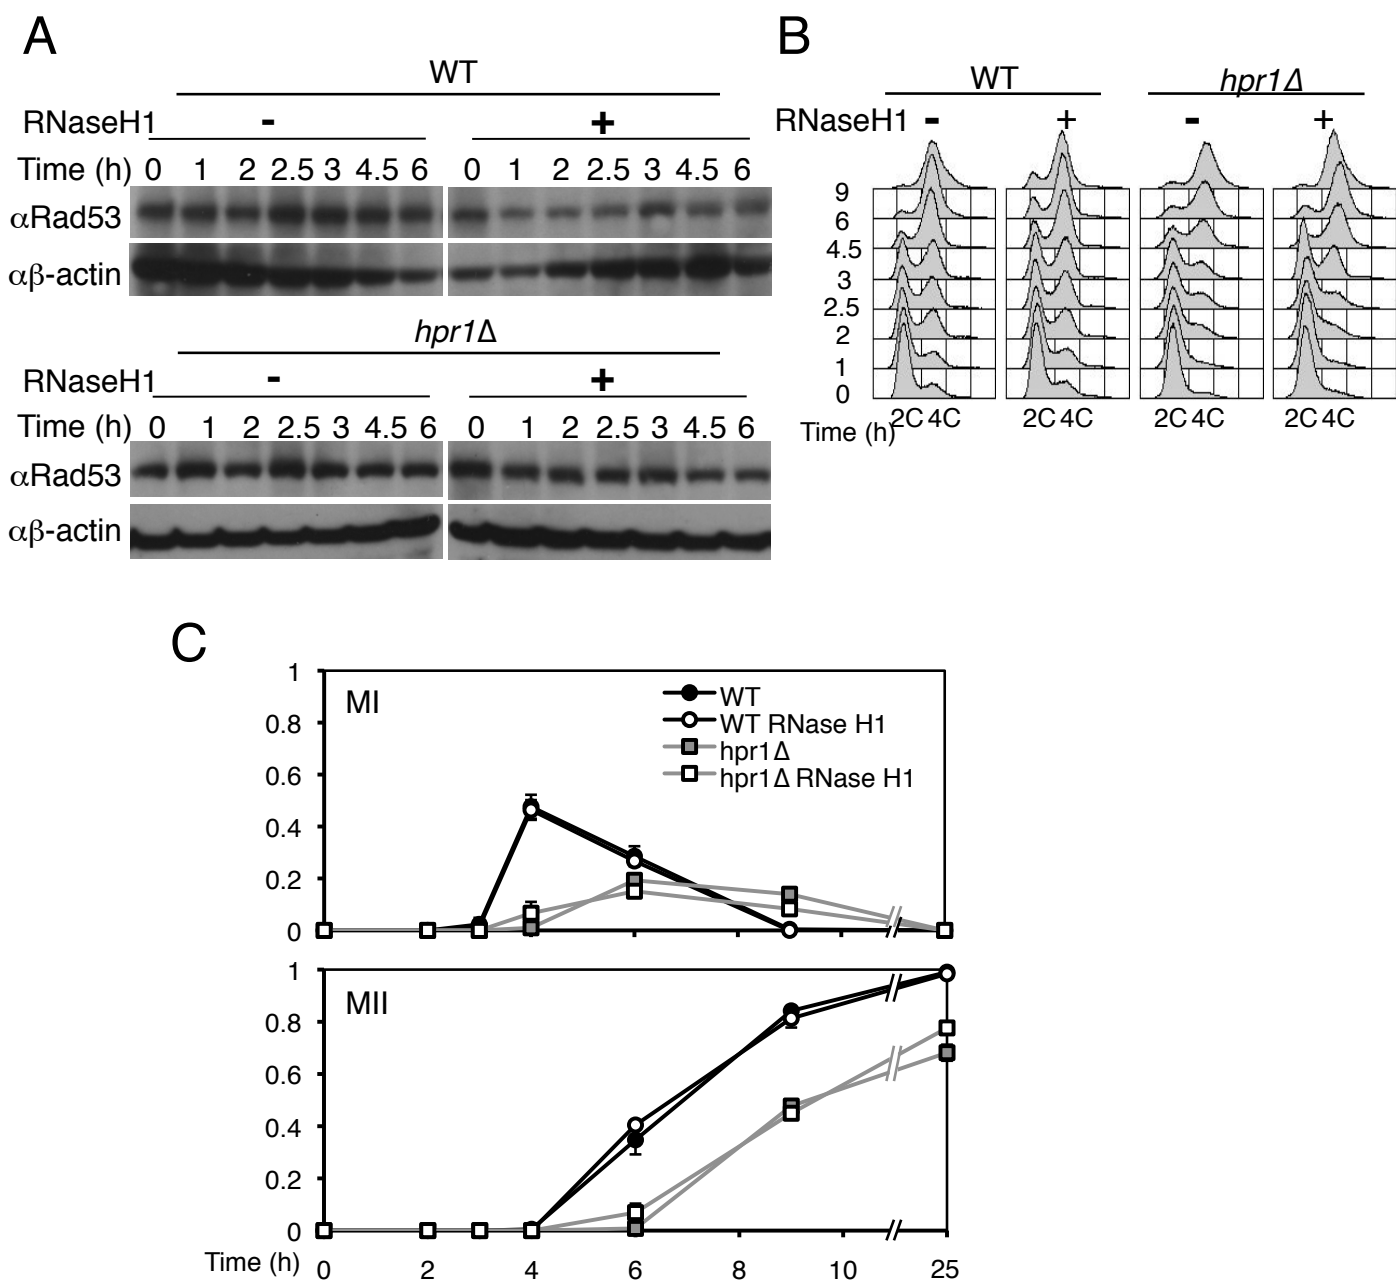

**Fig. S2. Overexpression of RNase H1 under *tet* promoter.** (A) Western analysis after transfer to sporulation media with and without RNase H1 overexpression. (B) FACS analysis of DNA contents after transfer to sporulation media for the indicated strains in the presence of absence of RNase H1 overexpression. (C) Fraction of cells that completed meiosis I (MI) and II (MII) in *HPR1* and *hpr1 $\Delta$  homozygous diploids with and without RNase H1 overexpression. The means of cells  $\pm$  SD are shown.*

**A**

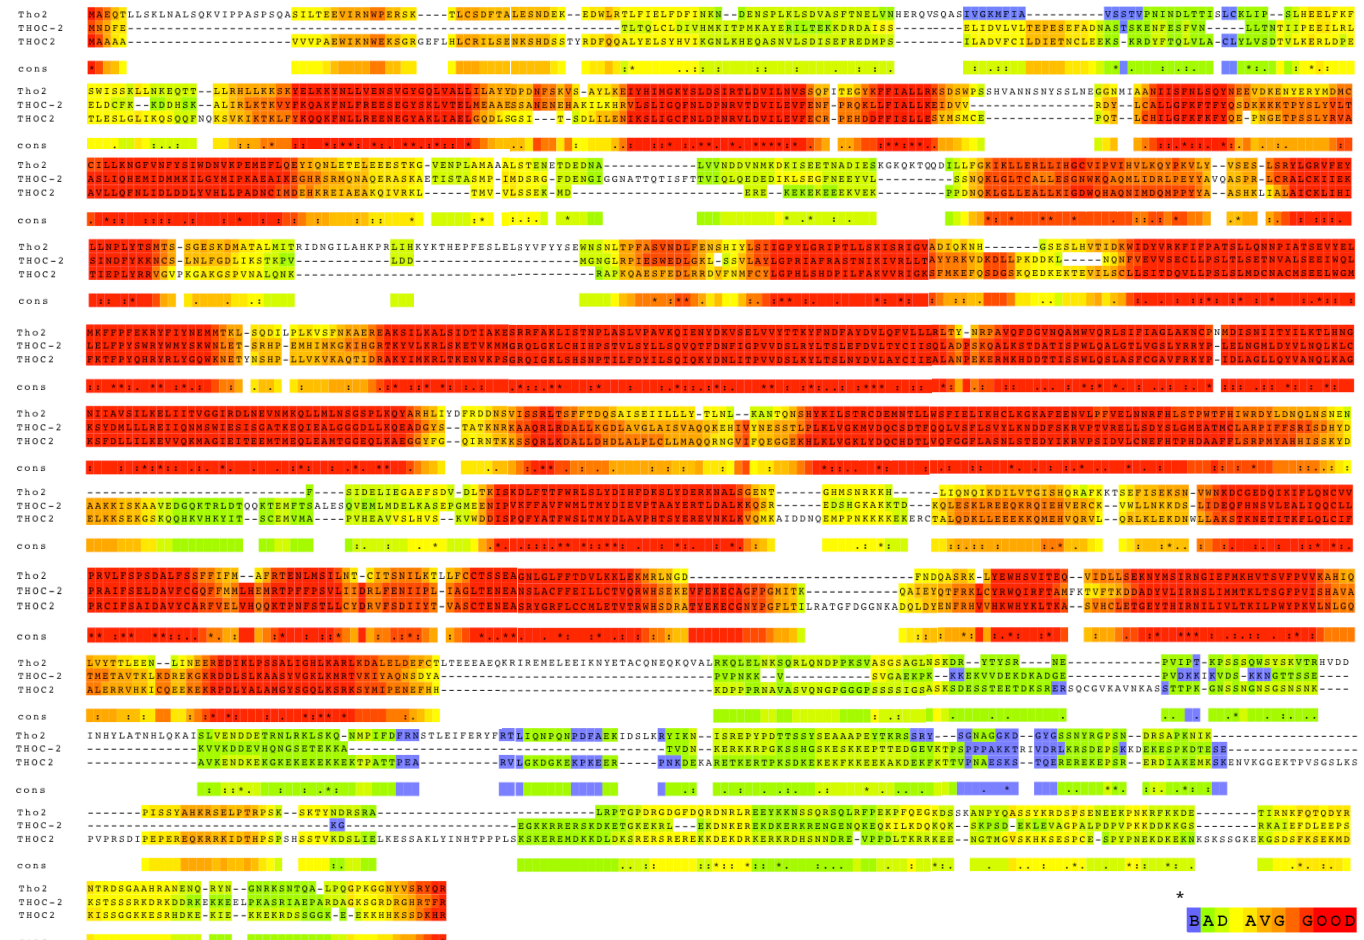

**B**

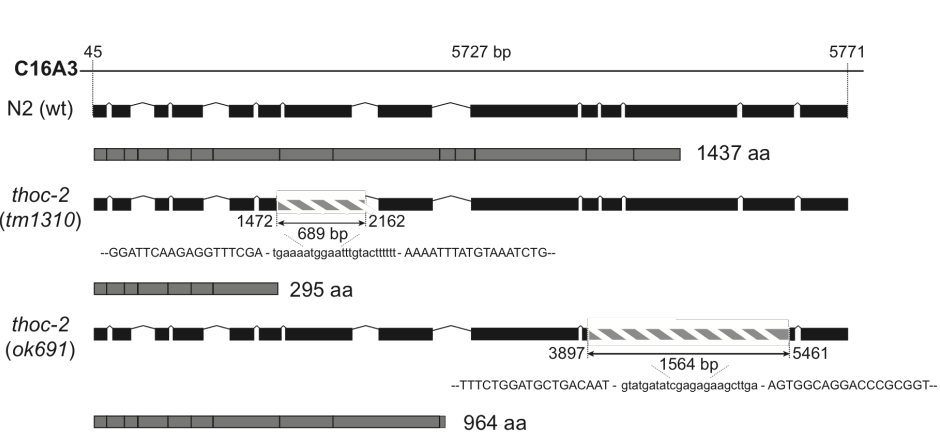

**C**

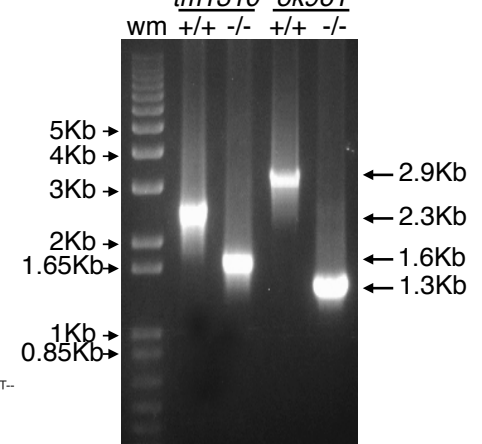

**Fig. S3. Characterization of *C. elegans thoc-2* deletion alleles.** (A) Alignment of *S. cerevisiae* Tho2, *C. elegans* THOC-2 and *H. sapiens* THOC2. (B) Scheme of *thoc-2* gene structure and the predicted protein product for wild-type and the *thoc-2(tm1310)* and *thoc-2(ok691)* deletion proteins. *thoc-2(tm1310)* carries a 689-bp deletion in exon 6, while *thoc-2(ok691)* carries a 1564-bp deletion in exon 10, and both generate a premature stop codon. Numbers indicate the nucleotide positions in cosmid C16A3.8. (C) Nested single worm PCR with *thoc-2* specific primers for both deletions. Wilde-type N2 (lanes 2 and 4), and *thoc-2(tm1310)* (lane 3) and *thoc-2(ok691)* (lane 5) mutant worms showing the 689-bp and 1564-bp deletions.

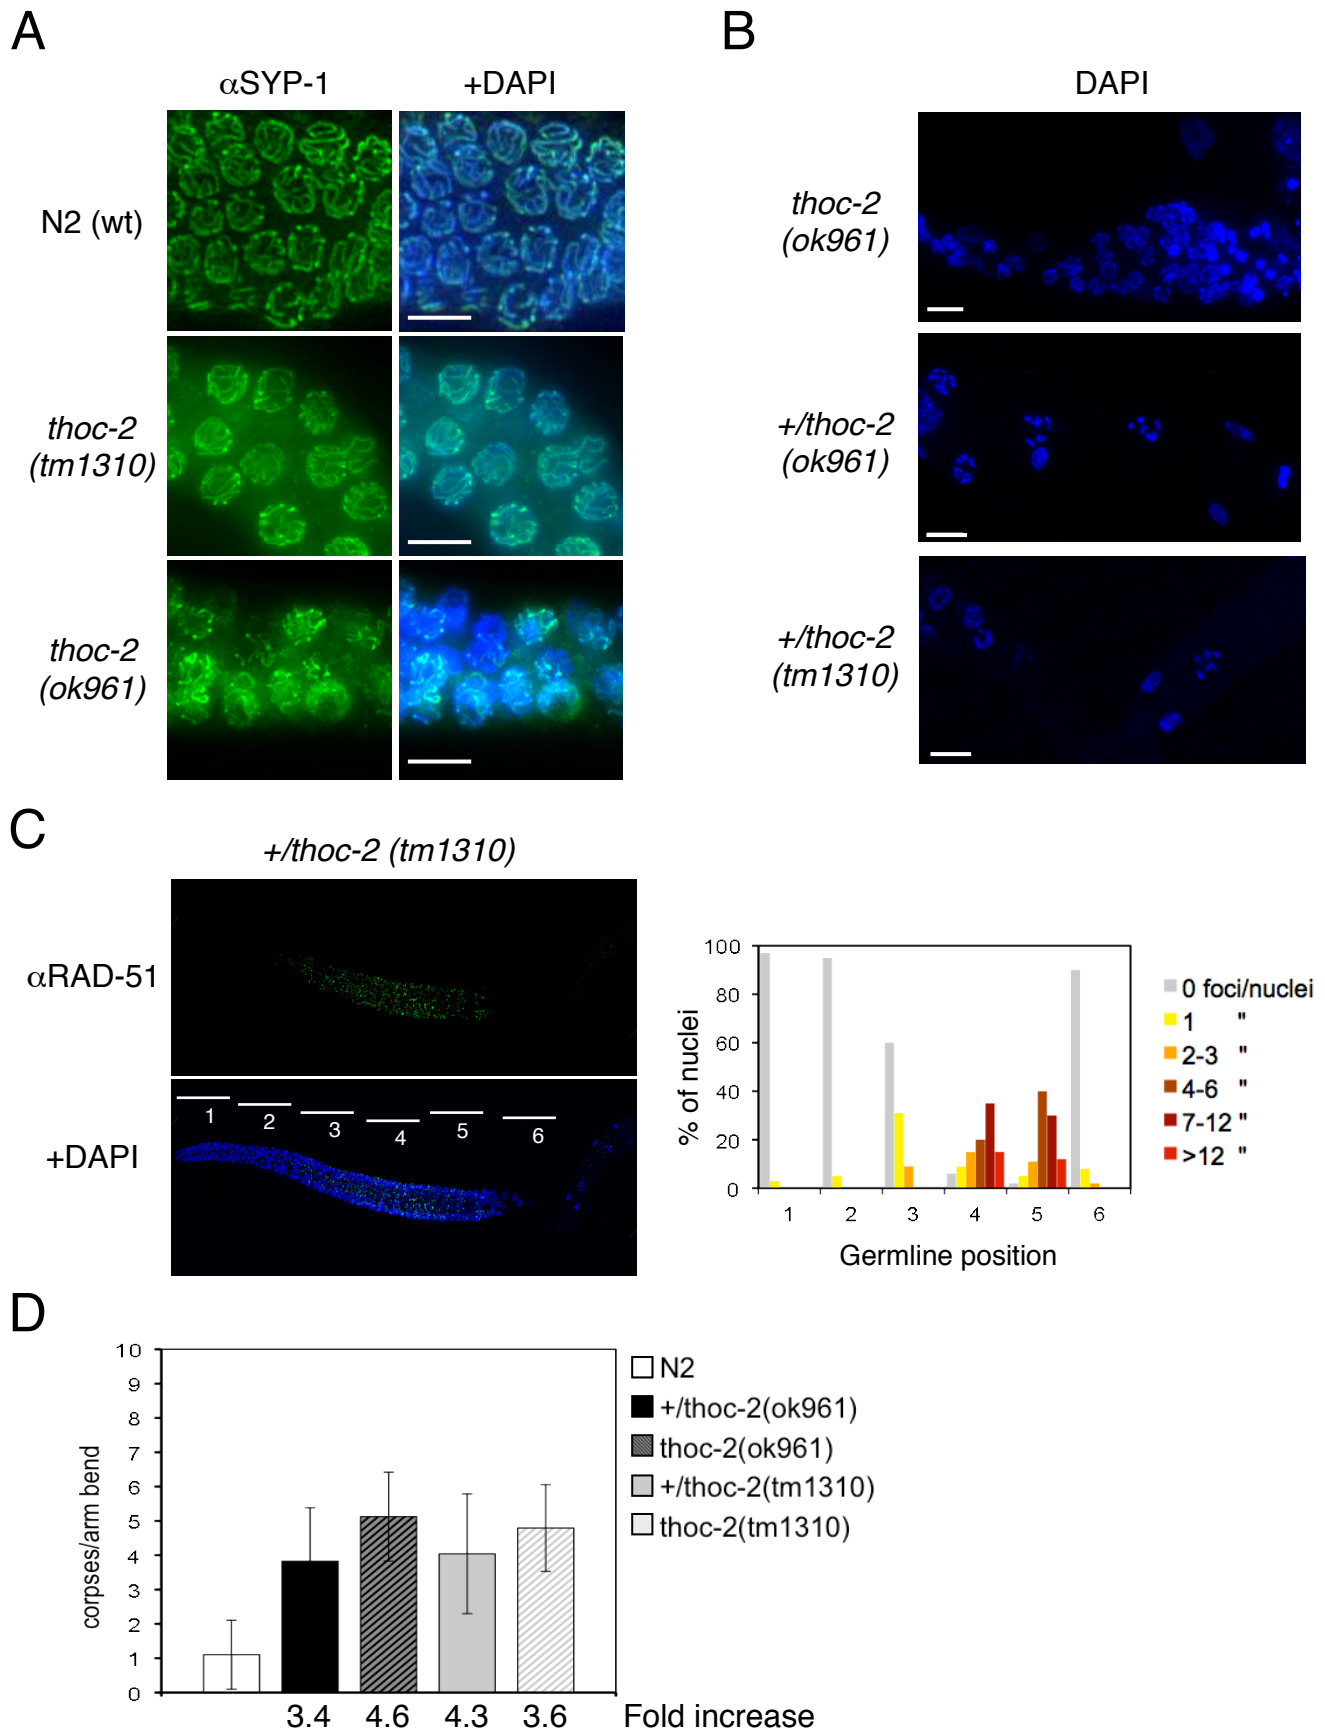

**Fig. S4. *thoc-2* animals show defective meiosis and increased apoptosis.** (A) Representative images of a pachytene germline region immunostained with SYP-1 and counterstained with DAPI from animals of the indicated genotype. (B) Representative

images of a diplotene-diakinesis germline region counterstained with DAPI from animals of the indicated genotype. (C) Representative image of heterozygous *thoc-2* mutants fixed germline immunostained with RAD-51 and quantification. (D) Quantification of apoptotic corpses in 24 hours post-L4 stage animals of the indicated genotypes. The means of apoptotic corpses per arm bend  $\pm$ SEM are shown. Scale bars represent  $10\mu\text{m}$ .

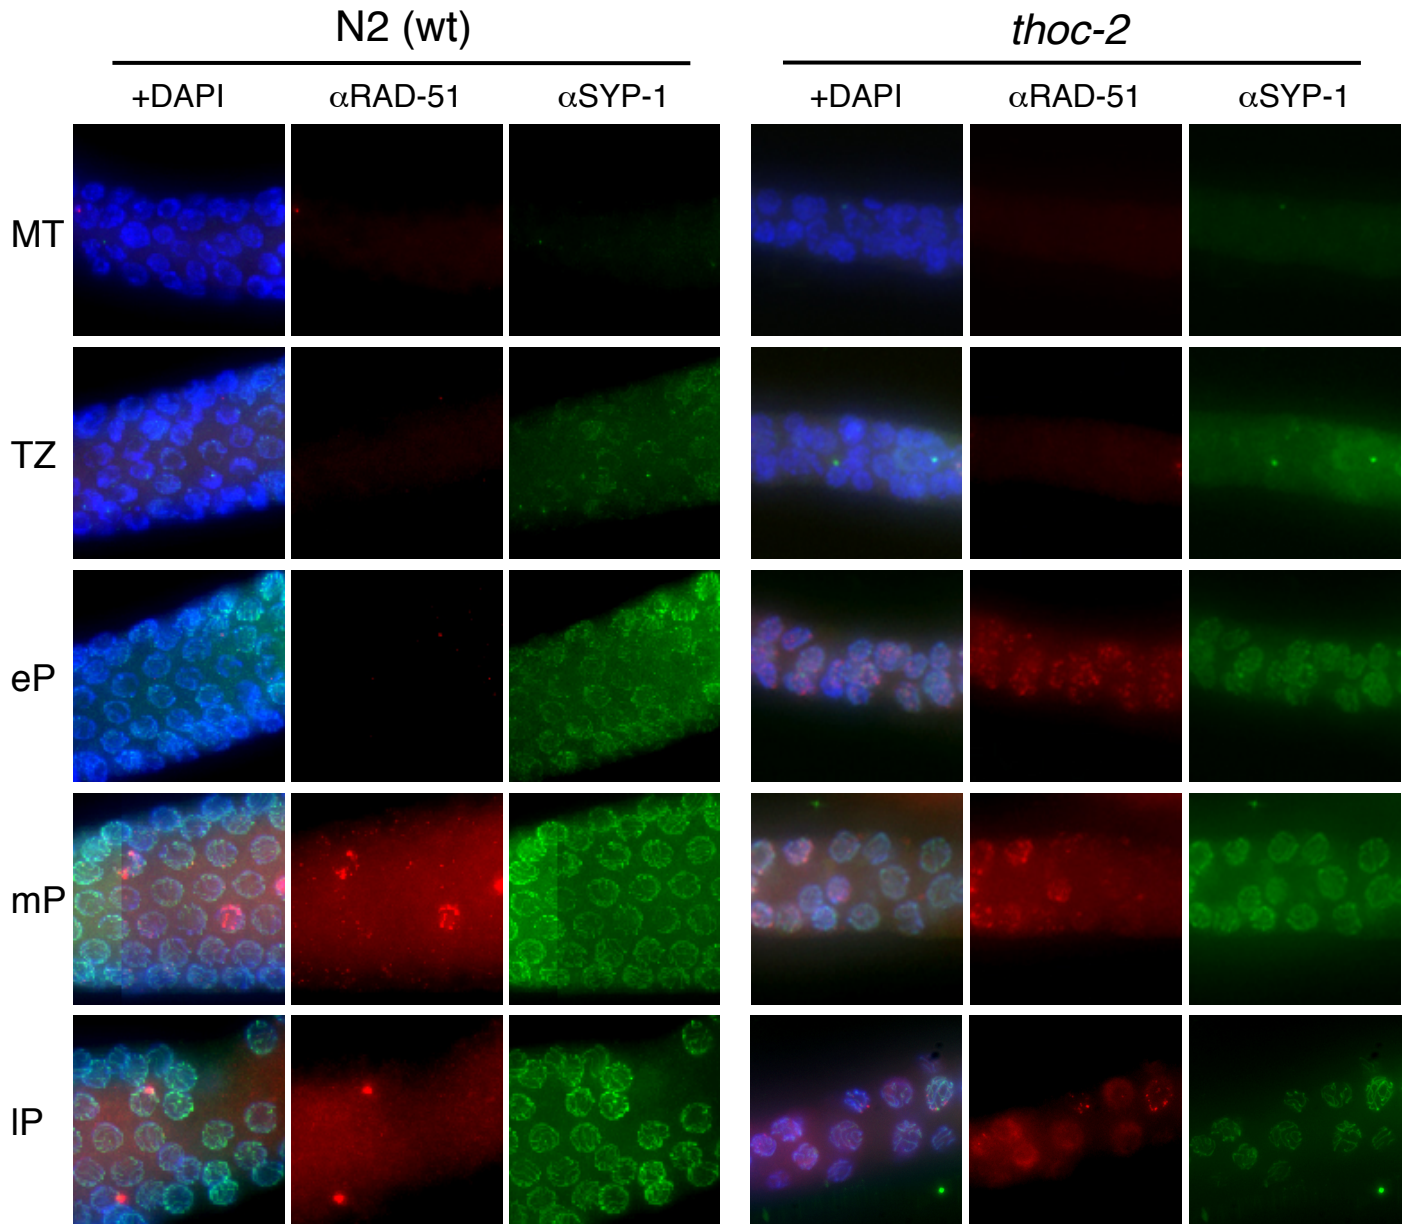

**Fig. S5. *thoc-2* animals show increased RAD-51 foci.** Representative images of mitotic (MT), transition zone (TZ), early, mid and late pachytene (eP, mP and IP) germline regions immunostained with SYP-1, RAD-51 and counterstained with DAPI from animals of the indicated genotype.

## **Supplementary Material and Methods**

### **Strains and maintenance**

*C. elegans* *thoc-2* deletions were backcrossed six times with wild type Bristol N2 and then balanced with JK2739. In order to generate the double mutant *thoc-2;spo-11*, previously the *spo-11* strain balancer was changed crossing with JK2663.

*S. cerevisiae* transformations were performed using the lithium acetate/polyethylene glycol method (Gietz and Woods, 2001).

*S. cerevisiae* synchronous meiotic cultures were prepared as described previously (Alani et al, 1990). Briefly, yeast cells were grown in liquid YPA (1% yeast extract, 2% Bacto Peptone, 1% Potassium Acetate) for 13 hours at 30°C. Cells were harvested, washed, and resuspended in SPM (0,3% Potassium Acetate) pre-equilibrated at 30°C. For RNase H overexpression under *GALI* promoter, the appropriated strains were transformed with the pGAL::RNH1 (Huertas & Aguilera, 2003) and the SPM was complemented or not with galactose (0.5%). For RNase H overexpression under *tet* promoter, the appropriated strains were transformed with the ptet::RNH1 and the SPM was complemented or not with doxocyclin (5µg/ml).

*S. cerevisiae* tetrads were dissected on solid media containing 2%peptone, 1% yeast extract, 4% glucose, 0.004% adenine, 2% agar, and spores were germinated at 30°C.

### ***S. cerevisiae* meiosis nuclear division profiles and DSB analysis**

Aliquots were collected from synchronized meiotic cultures at various times, fixed with 70% (v/v) ethanol and stained with 0.1 µg/ml with 4',6'-diamidino-2-phenylindole. Mononucleate, binucleate, and tetranucleate cells were scored by microscopy (at least 200 cells per time point).

For meiotic DSB detection genomic DNA was prepared in agarose plugs and digested with *StuI* (New England) and analyzed by Southern as described (Borde et al, 2004). Quantification with a Fuji FLA-5100 was performed according to standard procedures. Relative amount of the signal derived from each band was normalized with respect to the background of the respective line.

### **Plasmids**

To analyze Rad52 foci formation during meiosis, plasmid pWJ1344 carrying Rad52-YFP was used and described previously (Lysby et al., 2001).

Centromeric plasmid pCM189 carrying the yeast RNH1 ORF under *tet* promoter was obtained by PCR amplification of RNH1 ORF from plasmid pGAL::RNH1 (Huertas et al., 2003) using primers 5'-ATGGCAAGGCAAGGGAAGCTT-3' and 5'-TTATCGTCTAGATGCTCCTT-3' and cloned into pGEM-T vector. A *NotI* fragment was sub-cloned into pCM189 vector.

### **Fluorescence microscopy**

Leica DM6000B inverted microscope was used to examine the germlines with 40X HCXPL APO/1.25 OIL or 63X HCXPL APO/1.40 OIL lens, and images captured using Leica LAS AF computer software. For RAD-51 analysis a Confocal Leica TCS SP5 microscope with 40X HCXPL APO /1.5-0.75 OIL lens was used. Three-dimensional data sets were computationally deconvolved, and regions of interest projected into one dimension.

### **Cytological preparation and immunostaining**

Gravid hermaphrodites were transferred to 30ml PBS on a poly-L lysine coated slide (slides were washed in 70% ethanol, then given 2 coats of 100% poly-L-lysine, air drying between each coat). The worms were washed in PBS before transferring to 50ml 10mM levamisole. Germlines were extruded by removing the head and tail using a fine gauge needle (27 G). Levamisole was replaced with 4% para-formaldehyde (PFA) in PBS for 10min and germlines were permeabilized for 5 min in TBSBT (TBS+0.5% BSA +0.1% Triton X-100), then washed in TBSB for at least 2 5min, followed by blocking for 30min. Primary antibodies were diluted in TBSB and incubated overnight at 4°C in a humid chamber. Germlines were subsequently washed at RT at least 3x5 min in TBSB before incubation with the secondary antibody for 1–2h at room temperature. Finally, germlines were washed at least 3x5min in TBSB before mounting with a coverslip on Vectashield containing DAPI (Vector Laboratories). Dilutions used were the following: rabbit  $\alpha$ -RAD-51 (1:800) and guinea pig  $\alpha$ -SYP-1 (1:800). The appropriate secondary antibodies were diluted 1:5000.

### **In situ detection of germline DNA synthesis**

Direct incorporation of Cy3-dUTP into germline nuclei was performed as described (Jaramillo-Lambert et al, 2007), except that the injection mix consisted of 50  $\mu$ M Cy3-dUTP (Amersham Biosciences) in PBS pH 7.2. After the appropriate exposure to the Cy3-dUTP, gonads were dissected, fixed and DAPI-stained. The total number of cells that incorporated Cy3-dUTP was determined for each dissected germline. Commercial RNase H (Invitrogen) was co-microinjected at 0.2 U/ $\mu$ l.

### **Apoptosis assay**

Apoptotic corpses were visualized with SYTO-12 (Invitrogen) as described (Gumienny et al, 1999), at 16-20h post-L4. The total number of germlines scored for the different genotypes were: N2 n=49, *+thoc-2(ok961)* n=23, homozygous *thoc-2(ok961)* n=24, *+thoc-2(tm1310)* n=23, homozygous *thoc-2(tm1310)* n=30.



| <b>Table of <i>Caenorhabditis elegans</i> strains</b> |                                                                                                                  |           |
|-------------------------------------------------------|------------------------------------------------------------------------------------------------------------------|-----------|
| Strain name                                           | Genotype                                                                                                         | Origin    |
| N2                                                    | Bristol wild-type                                                                                                | CGC       |
| AV106                                                 | <i>spo-11(ok79)</i> IV/ nT1[unc-?(n754) let-?(IV;V)]                                                             | CGC       |
| JK2739                                                | <i>lin-6(e1466) dpy-5(e61)</i> I/ hT2[bli-4(e937) let-?(q782) qIs48](I;III)                                      | CGC       |
| JK2663                                                | <i>dpy-11(e224) mes-4(bn67)</i> V/ nT1[qIs50](IV;V)                                                              | CGC       |
| VC673                                                 | <i>thoc-2(ok961)</i> III/ hT2[bli-4(e937) let-?(q782) qIs48](I;III)                                              | CGC       |
| tm1310                                                | <i>thoc-2(tm1310)</i> III                                                                                        | S. Mitani |
| GIN101                                                | <i>thoc-2(tm1310)</i> III/ hT2[bli-4(e937) let-?(q782) qIs48](I;III) (X6 outcrossed)                             | This work |
| GIN102                                                | <i>thoc-2(ok961)</i> III/ hT2[bli-4(e937) let-?(q782) qIs48](I;III) (X6 outcrossed)                              | This work |
| GIN103                                                | <i>spo-11(ok79)</i> IV/ nT1[qIs50](IV;V)                                                                         | This work |
| GIN104                                                | <i>thoc-2(tm1310)</i> III/ <i>spo-11(ok79)</i> IV/ hT2[bli-4(e937) let-?(q782) qIs48] (I;III)/ nT1[qIs50] (IV;V) | This work |

| <b>Table of <i>Saccharomyces cerevisiae</i> strains</b> |                                                                                                          |                        |
|---------------------------------------------------------|----------------------------------------------------------------------------------------------------------|------------------------|
| Strain name                                             | Genotype                                                                                                 | Origin                 |
| NKY1551                                                 | <i>MAT a/a ho::LYS2/" ura3/" lys2/" leu::hisG/" arg-4-Nsp/arg4-Bgl his4X::LEU2(Bam)-URA3/HIS4B::LEU2</i> | (Teresawa et al, 2007) |
| NKY1551 <i>hpr1Δ</i>                                    | Same as NKY1515 but <i>hpr1ΔHYG/hpr1ΔKAN</i>                                                             | This work              |
| NKY611                                                  | <i>ho::LYS2/ ", ura3/ ", lys2/ ", leu2::hisG/ "</i>                                                      | (Alani et al, 1990)    |
| NKY611 <i>hpr1Δ</i>                                     | Same as NKY611 but <i>hpr1ΔHYG/hpr1ΔKAN</i>                                                              | This work              |
| NKY644 x NKY646                                         | <i>MAT a/a spo11Δ</i>                                                                                    | From N. Kleckner       |
| NKY644/646 <i>hpr1Δ</i>                                 | <i>MAT a/a spo11Δ hpr1Δ</i>                                                                              | This work              |

| <b>Table of Antibodies</b>              |     |          |                         |
|-----------------------------------------|-----|----------|-------------------------|
| Antibody                                | Use | Dilution | Reference               |
| Mouse $\alpha$ -BetaActine (8224)       | WB  | 1:1000   | Abcam                   |
| Rabbit $\alpha$ -H2ASer129P (15083-100) | WB  | 1:400    | Abcam                   |
| Rabbit $\alpha$ -RAD-51                 | IF  | 1:800    | (Alpi et al, 2003)      |
| Goat $\alpha$ -RAD-53 (yC-19)           | WB  | 1:300    | S.Cruz Btech.           |
| Guinea pig $\alpha$ -SYP-1              | IF  | 1:800    | (MacQueen et al., 2002) |

## Supplementary References

- Alani E, Padmore R, & Kleckner N (1990) Analysis of wild-type and rad50 mutants of yeast suggests an intimate relationship between meiotic chromosome synapsis and recombination. *Cell* 61(3):419-436 .
- Alpi A, Pasierbek P, Gartner A, & Loidl J (2003) Genetic and cytological characterization of the recombination protein RAD-51 in *Caenorhabditis elegans*. *Chromosoma* 112(1):6-16 .
- Borde V, Lin W, Novikov E, Petrini JH, Lichten M, Nicolas A. (2004) Association of Mre11p with double-strand break sites during yeast meiosis. *Mol Cell*. 13(3):389-401.
- Gietz RD, Woods RA. (2001) Genetic transformation of yeast. *Biotechniques*. 30(4):816-20, 822-6, 828 passim. Review.
- Gumienny TL, Lambie E, Hartweg E, Horvitz HR, & Hengartner MO (1999) Genetic control of programmed cell death in the *Caenorhabditis elegans* hermaphrodite germline. *Development* 126(5):1011-1022.
- Huertas P & Aguilera A (2003) Cotranscriptionally formed DNA:RNA hybrids mediate transcription elongation impairment and transcription-associated recombination. *Mol Cell* 12(3):711-721 .
- Jaramillo-Lambert A, Ellefson M, Villeneuve AM, & Engebrecht J (2007) Differential timing of S phases, X chromosome replication, and meiotic prophase in the *C. elegans* germ line. *Dev Biol* 308(1):206-221 .
- Lisby, M., R. Rothstein, and U. H. Mortensen. 2001. Rad52 forms DNA repair and recombination centers during S phase. *Proc. Natl. Acad. Sci. USA* 98:8276–8282.
- MacQueen AJ, Colaiacovo MP, McDonald K, Villeneuve AM (2002) Synapsis-dependent and -independent mechanisms stabilize homolog pairing during meiotic prophase in *C. elegans*. *Genes Dev* 16: 2428–2442
- Terasawa M, Ogawa H, Tsukamoto Y, Shinohara M, Shirahige K, Kleckner N, Ogawa T. (2007) Meiotic recombination-related DNA synthesis and its implications for cross-over and non-cross-over recombinant formation. *Proc Natl Acad Sci U S A* 104(14):5965-5970.
